# Supplementary material
Source: publisher figshare collection journal article supplement (https://sage.figshare.com/ndownloader/files/12957287)
Supplement: Supplementary file 1 [file 12957287]

## Food & Fitness Cross-Site Evaluation

### Data Reporting Cover Sheet and Summary Table for Systems and Policy Change Efforts

#### Partnership Information

|                        |  |
|------------------------|--|
| Name of Partnership    |  |
| Fiduciary Organization |  |
| Project Director       |  |
| Other Staff/Roles      |  |
| Evaluation Team        |  |

#### Zip Codes where partnership work is taking place

|  |
|--|
|  |
|--|

#### Ways in which evaluation has been used

How has the evaluation and/or its findings been used to further the work of your partnership?  
Please indicate all that apply and provide details.

|                                               | Yes/No | Please provide details. |
|-----------------------------------------------|--------|-------------------------|
| Monitor progress                              |        |                         |
| Inform current work                           |        |                         |
| Highlight successes                           |        |                         |
| Lead discussions with partners about the work |        |                         |
| Obtain new grants or other resources          |        |                         |
| Inform policy makers                          |        |                         |
| Advocate for policy change                    |        |                         |
| Other, please specify                         |        |                         |

**Summary Table of Systems and Policy Change Efforts** This table is designed to provide a summary of all Systems and Policy Change efforts reported by your partnership over time. Please identify the status of each effort by placing an 'X' in the appropriate column(s).

[illegible]

## Methods for Data Collection and Reporting

Document your process for collecting and reporting information for the Cross-Site Evaluation, including staff, collaborative members, and other partners involved:

# **Systems and Policy Change Form**

The Systems and Policy Change Form is to be used to document and track the major systems and policy change efforts, outcomes, and impact of your collaborative partnership.

## Systems and Policy Change Form

### A. Title and unique identifier of system or policy change effort

B1. Briefly describe the system or policy change effort.

B2. For follow-up reporting, describe what has changed for this effort over the past year.

### C. Phase of Systems or Policy Change Effort

1. Current phase of change of the *system or policy change effort* – please check only one:

- |                                                                         |                                                                                                                                                                                                                                                                                                                                                                                 |
|-------------------------------------------------------------------------|---------------------------------------------------------------------------------------------------------------------------------------------------------------------------------------------------------------------------------------------------------------------------------------------------------------------------------------------------------------------------------|
| <input type="checkbox"/> <b>Beginning/Development</b>                   | (E.g., identified and agreed upon goals; strategies developed; strategic partnerships formed; idea for change is growing in momentum; base of support beyond the partnership is growing;                                                                                                                                                                                        |
| <input type="checkbox"/> <b>Proposed Plan Drafted and/or Introduced</b> | (E.g., formalized plan, proposal, rule, regulation, code, ordinance, or piece of legislation has been submitted or introduced and is being considered by the decision making body; considered plan is being revised or reintroduced to reflect needed changes; application for funding has been submitted)                                                                      |
| <input type="checkbox"/> <b>Adoption</b>                                | (E.g., the change has been adopted by the decision making body and is documented in rules, guidelines, regulations, laws, budgets or other written documents; funding application has been approved)                                                                                                                                                                            |
| <input type="checkbox"/> <b>Implementation</b>                          | (E.g., funding for the change is appropriated by an organization, institution, system, agency, or legislature; state, local, or school entities are beginning to implement the change; a process for monitoring implementation has been established; capacity is being built such as hiring staff, training employees, or securing space and equipment for full implementation) |
| <input type="checkbox"/> <b>Maintenance/Enforcement</b>                 | (E.g., change has been fully implemented and efforts are underway to ensure that the change is sustained; a process for continuous monitoring and enforcement is in place; funding to sustain the change is reflected in annual budgets)                                                                                                                                        |

**D. Partnership's role in this effort**

**1. Leadership for this effort provided by the Food & Fitness partnership – please check one.**

- ☐ **Leader (your partnership is taking the lead in this effort)**
- ☐ **Shared Leadership (your partnership is one of the key leaders or lead organizations working toward the change)**  
Identify the other leader(s) of this effort \_\_\_\_\_
- ☐ **Contributing Collaborator (your partnership is not a leader but is an active contributor, part of a larger effort)**  
Identify the leader(s) of this effort \_\_\_\_\_

**2. What is your partnership's unique role in this effort?**

**3. For follow-up reporting, in what ways, if any, has the partnership's leadership role in this effort changed over the past year?**

**E. Important strategies and tactics**

- 1. Describe the 3 most important strategies and tactics that have been undertaken by the partnership in this effort.**
- 2. How do you think they helped move the work forward? Please be very specific.**

**F. What one thing has been most critical in moving this effort forward?**

**G. Describe up to 3 specific obstacles that hindered your efforts.**

**H. What accomplishments (benchmarks) have already occurred that tell you you're reaching your goal? (E.g. pilot/demonstration programs that have potential for scale-up, strategic decision makers on board, resources allocated)**

**I. What are the next steps?**

**J. From 1 (low sustainability) to 5 (high sustainability), to what extent do you think your accomplishments in this effort thus far will continue once the current funding has ended?**

Rating =

Comments:

**K. What factors in the community or the larger environment helped move the effort forward?**

*Examples include:*

- Goals are aligned with those individuals that are in positions of power
- Increased public awareness about the need for change
- Funding exists from multiple sources

**L. Collaborative Partners: Please provide information below about core and strategic partners who have had a key role in the work of the partnership.**

| Partner name | Please indicate whether this is an individual partner (I) organizational partner (O) or both (B)<br><br>• <b>Individual Partner</b><br>Does not represent a specific organization in this partnership<br><br>• <b>Organizational Partner</b><br>Represents a specific organization in this partnership | Role in organization or community | Name of organization if applicable | Affiliation<br><br>• Government<br>• School (Pre-K – 12)<br>• For-profit business<br>• Nonprofit community-based organization<br>• Other nonprofit organization<br>• Other (specify)<br>• None | Describe partner's contribution in advancing this effort (What could not have happened without this partner?) |
|--------------|--------------------------------------------------------------------------------------------------------------------------------------------------------------------------------------------------------------------------------------------------------------------------------------------------------|-----------------------------------|------------------------------------|------------------------------------------------------------------------------------------------------------------------------------------------------------------------------------------------|---------------------------------------------------------------------------------------------------------------|
|              |                                                                                                                                                                                                                                                                                                        |                                   |                                    |                                                                                                                                                                                                |                                                                                                               |
|              |                                                                                                                                                                                                                                                                                                        |                                   |                                    |                                                                                                                                                                                                |                                                                                                               |
|              |                                                                                                                                                                                                                                                                                                        |                                   |                                    |                                                                                                                                                                                                |                                                                                                               |
|              |                                                                                                                                                                                                                                                                                                        |                                   |                                    |                                                                                                                                                                                                |                                                                                                               |
|              |                                                                                                                                                                                                                                                                                                        |                                   |                                    |                                                                                                                                                                                                |                                                                                                               |
|              |                                                                                                                                                                                                                                                                                                        |                                   |                                    |                                                                                                                                                                                                |                                                                                                               |

**1. Describe the quality of these relationships/connections and how the partners work together to make change.**

**2. Is there anyone you would identify as a champion of this particular effort of the partnership?** (E.g. someone who is a strong advocate for the effort, particularly in the face of opposition; someone in a position to make decisions or influence decision makers; someone called in for assistance as a strategic partner during specific times).

**Describe how this individual is championing this effort.**

**3. What other partners must be involved that aren't currently involved for your efforts to achieve success?**

## M. FOCUS ON EQUITY

### 1. Equity in the Partnership

a. Please indicate your partnership's level of agreement with the following items related to equity in the partnership by checking your response on the 5 point scale

|                                                                                   | 5<br>Strongly<br>Agree | 4<br>Agree | 3<br>Neutral | 2<br>Disagree | 1<br>Strongly<br>Disagree |
|-----------------------------------------------------------------------------------|------------------------|------------|--------------|---------------|---------------------------|
| i. Partners are equitably involved in the decision-making process.                |                        |            |              |               |                           |
| ii. Power is shared among all partners.                                           |                        |            |              |               |                           |
| iii. Expertise is valued across all partners.                                     |                        |            |              |               |                           |
| iv. The partnership is building capacity for members to take on leadership roles. |                        |            |              |               |                           |

b. Please provide comments about the focus on equity in the partnership

|  |
|--|
|  |
|  |
|  |

## 2. Equity in the Outcomes

- a. Please indicate your partnership's level of engagement with the following items related to equity in the partnership by checking your response on the 5 point scale

|      |                                                                                                                               | 5<br>Strongly<br>Agree | 4<br>Agree | 3<br>Neutral | 2<br>Disagree | 1<br>Strongly<br>Disagree |
|------|-------------------------------------------------------------------------------------------------------------------------------|------------------------|------------|--------------|---------------|---------------------------|
| i.   | When planning for policy change work, significant consideration is given to who may benefit and who may be harmed by changes. |                        |            |              |               |                           |
| ii.  | Improvements in the opportunities for health are taking place in neighborhoods facing inequities.                             |                        |            |              |               |                           |
| iii. | Changes have occurred in health outcomes among community residents in neighborhoods facing inequities.                        |                        |            |              |               |                           |

- b. Please provide comments about the focus of equity in the outcomes of the work

|  |
|--|
|  |
|  |
|  |

# Systems and Policy Change Form

## N. OUTCOMES

Report **significant outcomes to date** from this particular effort. For follow-up years, report new outcomes and changes/updates to previous outcomes.

Please **DO NOT** include any potential or anticipated outcomes or impact.

Outcomes on the same row should be linked or associated in some way.

| Policy Outcomes                                                                                                                                                                                                                            |                                                                                                                                         | Infrastructure Outcomes<br>(e.g. improvements to sidewalks, walking trails, bicycle lanes, community park development or maintenance, addition of salad bars in schools, improving facilities for food prep and storage) | Quantitative Indicators<br>(e.g. number of dollars spent on local food in the school district, number of children biking and walking to school, EBT dollars spent at farmers' markets) | Impact of the Change<br>(e.g. total number of those affected by the change) |
|--------------------------------------------------------------------------------------------------------------------------------------------------------------------------------------------------------------------------------------------|-----------------------------------------------------------------------------------------------------------------------------------------|--------------------------------------------------------------------------------------------------------------------------------------------------------------------------------------------------------------------------|----------------------------------------------------------------------------------------------------------------------------------------------------------------------------------------|-----------------------------------------------------------------------------|
| Policy change<br>(e.g. written school district requirements, joint use agreements, funds allocated in the public budget, changes to local ordinances, codes, city plans, or Federal Nutrition Programs/Federal Fruit & Vegetable Programs) | Where is policy documented?<br>(e.g. school policy handbook, city zoning law, city council ordinance, school food procurement contract) |                                                                                                                                                                                                                          |                                                                                                                                                                                        |                                                                             |
|                                                                                                                                                                                                                                            |                                                                                                                                         |                                                                                                                                                                                                                          |                                                                                                                                                                                        |                                                                             |
|                                                                                                                                                                                                                                            |                                                                                                                                         |                                                                                                                                                                                                                          |                                                                                                                                                                                        |                                                                             |
|                                                                                                                                                                                                                                            |                                                                                                                                         |                                                                                                                                                                                                                          |                                                                                                                                                                                        |                                                                             |
|                                                                                                                                                                                                                                            |                                                                                                                                         |                                                                                                                                                                                                                          |                                                                                                                                                                                        |                                                                             |
|                                                                                                                                                                                                                                            |                                                                                                                                         |                                                                                                                                                                                                                          |                                                                                                                                                                                        |                                                                             |
|                                                                                                                                                                                                                                            |                                                                                                                                         |                                                                                                                                                                                                                          |                                                                                                                                                                                        |                                                                             |

If this effort has resulted in larger changes to systems, please describe below and identify any outcomes in the table associated with these changes.

|  |
|--|
|  |
|  |
|  |
|  |

# Systems and Policy Change Form

## O. METHODS

**Describe your process for collecting, verifying, and reporting the information in the systems and policy change form.**

*Examples:*

- Who contributed information?
- How was the information gathered?
- Who compiled the report?
- How was the information confirmed and verified?
